# Supplementary material
Source: PubMed Central journal article supplement (PMC8921585)

Supplementary Table 1. ICD-9 Clinical Modification (CM) Codes used for disease identification

| Diseases                        | ICD-9 CM Codes                                                         |
|---------------------------------|------------------------------------------------------------------------|
| Rheumatoid arthritis            | 714                                                                    |
| Reactive arthritis <sup>1</sup> | 099.3,711.1,711.3,716.4,716.5,716.6,716.9,719.4                        |
| Systemic lupus erythematosus    | 710.0                                                                  |
| Spondyloarthritis               | 720.0                                                                  |
| Psoriasis                       | 696                                                                    |
| Multiple sclerosis              | 340                                                                    |
| Inflammatory Bowel Disease      | 555; 556                                                               |
| Neoplasm                        | 140-149, 150-159, 160-165, 170-172, 174-176, 179-189, 190-195, 200-209 |

<sup>1</sup> Curry JA, Riddle MS, Gormley RP, Tribble DR, Porter CK. The epidemiology of infectious gastroenteritis related reactive arthritis in U.S. military personnel: a case-control study. *BMC Infectious Diseases* 2010; 10(1): 266.

Supplementary Table 2. BNF codes used for medication

|                   | BNF code | Notes                                                                                                                                                                                                                                                                                           |
|-------------------|----------|-------------------------------------------------------------------------------------------------------------------------------------------------------------------------------------------------------------------------------------------------------------------------------------------------|
| Immunosuppressant | 8.2      |                                                                                                                                                                                                                                                                                                 |
| NSAIDs            | 10.1.1   |                                                                                                                                                                                                                                                                                                 |
| Corticosteroids   | 10.1.2   |                                                                                                                                                                                                                                                                                                 |
| b/tsDMARDs        | 10.1.3   | Drug item codes in HK EMR:<br>ABAT01/03, ABT-03, ADAL05/08/10/13/15/16,<br>ANAK01, BARI15-18, BELI01/02/05, CERT01/02,<br>ETAN01/04-06/08-10,<br>FILG07/08/10, GOLI02/04-06,<br>INFL03/04/31/33, IXEK01/02, LEFL01-03, S01257, S01311,<br>S01315, SARI03-06, SECU02/03, TOCI01/03-09, TOFA01-05 |
| csDMARDs          | 10.1.3   | Drug item codes in HK EMR:<br>HYDR21;<br>METH10, METH1D, METH1E, METH1G, METH1L;<br>PENI04,PENI06,PENI07;<br>SULP23                                                                                                                                                                             |
| Drugs for gout    | 10.1.4   |                                                                                                                                                                                                                                                                                                 |

**Abbreviation:** BNF: British National Formulary; NSAIDs: Non-steroidal anti-inflammatory drugs; b/tsDMARDs: biological/target synthetic disease-modifying antirheumatic drugs; csDMARDs: conventional synthetic disease-modifying antirheumatic drugs; HK EMR: Hong Kong electronic medical records

Supplementary Figure 1. Flow chart of record linkage, matching and cohort identification

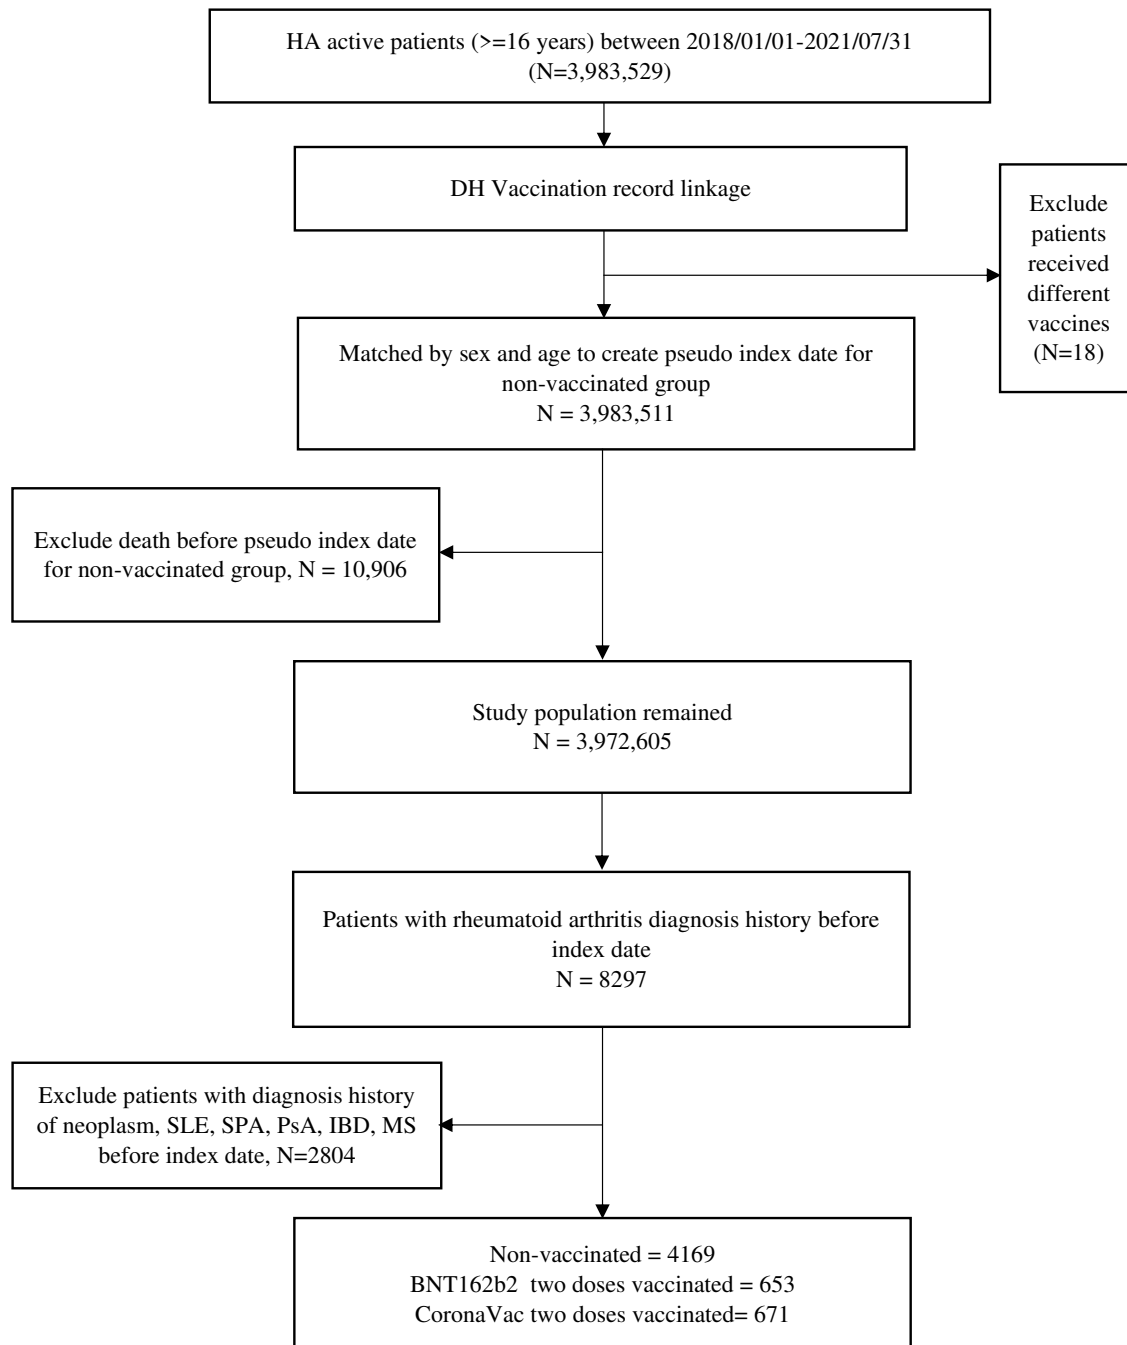

**Abbreviation:** HA: Hospital Authority of Hong Kong; DH: Department of Health of Hong Kong government; SLE: systemic lupus erythematosus; SPA: spondyloarthritis; PsA: psoriasis; IBD: inflammatory bowel disease; MS: multiple sclerosis.

Supplementary Figure 2. Number of patients with rheumatoid arthritis who took at least one dose Covid-19 vaccines between February and July 2021 in Hong Kong

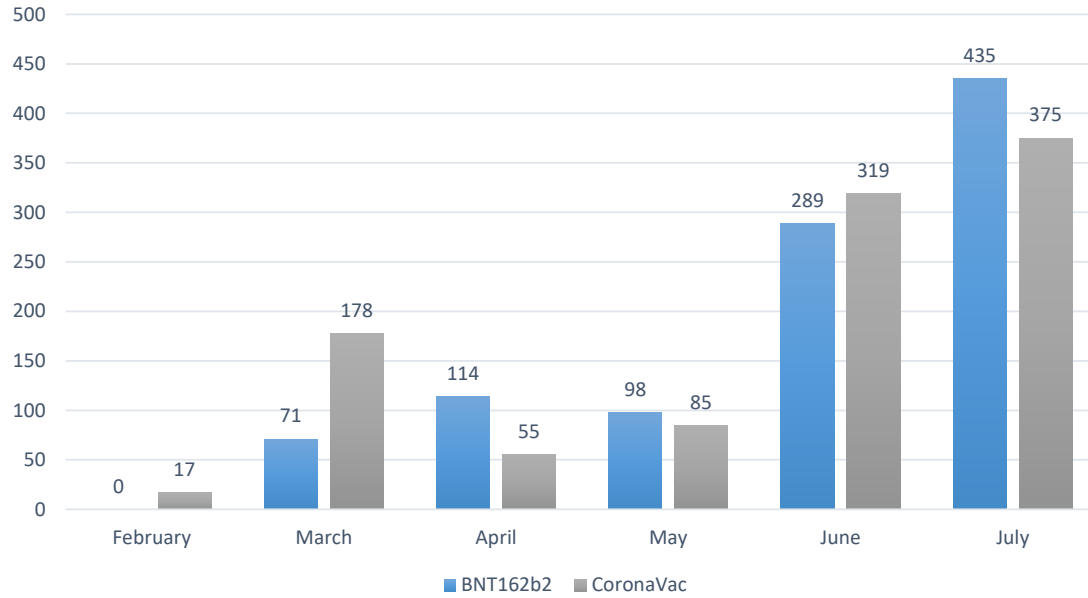

Supplement: annrheumdis-2021-221571supp001.pdf [file annrheumdis-2021-221571supp001.pdf]
